# Supplementary material for: The association between Helicobacter pylori seropositivity and risk of new-onset diabetes: a prospective cohort study
Source: Springer Nature journal article supplement (doi:10.1007/s00125-017-4465-2), 2017-10-30
Supplement: MOESM1 [file 15177168]

## Electronic Supplementary Material

### Contents

**Page 2. ESM Table 1** Baseline characteristics of the participants who were included and who were lost in the follow-up (2002-2012)

**Page 3. ESM Table 2** Multivariate analysis of the association between *H. pylori* seropositivity and risk of developing diabetes (2002–2012)

**Page 4. ESM Table 3** Baseline (2007) characteristics of the study participants

**Page 5. ESM Table 4** Multivariate analysis of the association between persistent *H. pylori* seropositivity and risk of developing diabetes (2007–2012)

**Page 6. ESM Table 5** Competing risk analysis for the participants lost and died (2002-2012)

**Page 7-8. ESM Fig. 1** Flow chart of study population

**Page 9. ESM Fig. 2** Pre-Study validation of the *H. pylori* antibodies measurement with known concentrations of *H. pylori* antibodies samples.

**ESM Table 1** Baseline characteristics of the participants who were included and who were lost in the follow-up (2002-2012)

|                                          | Participants eligible<br>(n=2085) | Participants lost<br>(n=219) | p value |
|------------------------------------------|-----------------------------------|------------------------------|---------|
| <i>H. pylori</i> seropositivity          | 1208 (58.0)                       | 116 (53.0)                   | 0.157   |
| Age, mean (SD), years                    | 57.0 (7.8)                        | 58.4 (8.3)                   | 0.014   |
| Women (%)                                | 1214 (58.2)                       | 99 (45.2)                    | <0.001  |
| BMI, mean (SD), kg/m <sup>2</sup>        | 25.2 (3.3)                        | 25.4 (3.4)                   | 0.502   |
| Blood lipid levels, mean (SD),<br>mmol/l |                                   |                              |         |
| TC                                       | 5.4 (1.0)                         | 5.3 (1.0)                    | 0.166   |
| LDL-C                                    | 3.2 (0.8)                         | 3.3 (0.8)                    | 0.815   |
| HDL-C                                    | 1.4 (0.3)                         | 1.3 (0.3)                    | 0.022   |
| TG                                       | 1.3 (0.9-1.9)                     | 1.4 (1.0-2.0)                | 0.220   |
| FBG, mean (SD), mmol/l                   | 4.7 (0.5)                         | 4.7 (0.6)                    | 0.934   |
| Blood pressure, mean (SD),<br>mmHg       |                                   |                              |         |
| Systolic                                 | 129.9 (18.7)                      | 133.0 (20.3)                 | 0.023   |
| Diastolic                                | 81.8 (10.2)                       | 82.9 (10.6)                  | 0.119   |
| Hs-CRP, median (IQR),mg/l                | 1.1 (0.6-2.2)                     | 1.3 (0.7-2.3)                | 0.093   |
| Current smoking (%)                      | 256 (12.3)                        | 38 (17.4)                    | 0.032   |
| Hypertension (%)                         | 911 (43.7)                        | 103 (49.3)                   | 0.111   |
| Lipid-lowering medication<br>(%)         | 149 (7.1)                         | 11(5.0)                      | 0.240   |
| Education ≤ 12 years (%)                 | 869 (41.7)                        | 100 (45.7)                   | 0.252   |

**ESM Table 2** Multivariate analysis of the association between *H. pylori* seropositivity and risk of developing diabetes (2002–2012)

| Variables                       | All Participants<br>( <i>n</i> =2085) |                | Participants without IFG<br>( <i>n</i> =2043) |                |
|---------------------------------|---------------------------------------|----------------|-----------------------------------------------|----------------|
|                                 | RR (95% CI)                           | <i>p</i> value | RR (95% CI)                                   | <i>p</i> value |
| <i>H. pylori</i> seropositivity | 0.78 (0.63, 0.97)                     | 0.022          | 0.80 (0.64, 1.01)                             | 0.057          |
| Age                             | 0.99 (0.97, 1.00)                     | 0.055          | 0.98 (0.97, 1.00)                             | 0.089          |
| Female                          | 1.02 (0.80, 1.29)                     | 0.709          | 1.03 (0.80, 1.32)                             | 0.818          |
| BMI                             | 1.06 (1.03, 1.10)                     | <0.001         | 1.07 (1.04, 1.11)                             | <0.001         |
| HDL-C                           | 0.56 (0.35, 0.89)                     | 0.015          | 0.53 (0.33, 0.86)                             | 0.009          |
| TG                              | 1.21 (0.95, 1.55)                     | 0.149          | 1.14 (0.88, 1.48)                             | 0.327          |
| Hs-CRP                          | 1.46 (1.14, 1.88)                     | 0.004          | 1.54 (1.19, 2.00)                             | 0.001          |
| SBP (5 mmHg)                    | 1.03 (1.00, 1.06)                     | 0.061          | 1.03 (0.99, 1.06)                             | 0.108          |
| FBG                             | 3.38 (2.92, 3.92)                     | <0.001         | 4.52 (3.62, 5.65)                             | <0.001         |
| Lipid-lowering medication       | 1.67 (1.23, 2.29)                     | 0.001          | 1.60 (1.15, 2.23)                             | 0.006          |
| Education > 12 years            | 1.19 (0.93, 1.53)                     | 0.158          | 1.17 (0.90, 1.51)                             | 0.236          |

**Adjusted variables:** age (continuous variable), female (male or female), body mass index (continuous variable), systolic blood pressure (per 5 mmHg, continuous variable), high-density lipoprotein cholesterol (continuous variable), triacylglycerol (<1.7 or ≥1.7 mmol/l), fasting blood glucose (continuous variable), lipid-lowering therapy (no or yes), high-sensitivity C-reactive protein (<3 or ≥3 mg/l) and education levels (≤12 or >12 years)

**ESM Table 3** Baseline (2007) characteristics of the study participants

|                                       | persistent <i>H. pylori</i><br>seronegativity<br>( <i>n</i> =514) | persistent <i>H. pylori</i><br>seropositivity<br>( <i>n</i> =677) | <i>p</i> value |
|---------------------------------------|-------------------------------------------------------------------|-------------------------------------------------------------------|----------------|
| Age, mean (SD), years                 | 62.6 (7.8)                                                        | 60.6 (7.7)                                                        | <0.001         |
| Women (%)                             | 308 (59.9)                                                        | 417 (61.6)                                                        | 0.558          |
| BMI, mean (SD), kg/m <sup>2</sup>     | 24.4 (3.0)                                                        | 25.1 (3.4)                                                        | <0.001         |
| Blood lipid levels, mean (SD), mmol/l |                                                                   |                                                                   |                |
| TC                                    | 5.3 (1.0)                                                         | 5.4 (1.0)                                                         | 0.102          |
| LDL-C                                 | 3.3 (0.9)                                                         | 3.5 (0.8)                                                         | 0.008          |
| HDL-C                                 | 1.4 (0.3)                                                         | 1.4 (0.3)                                                         | 0.562          |
| TG                                    | 1.3 (0.9-1.9)                                                     | 1.3 (0.9-1.9)                                                     | 0.807          |
| FBG, mean (SD), mmol/l                | 5.5 (0.5)                                                         | 5.5 (0.5)                                                         | 0.138          |
| Blood pressure, mean (SD), mmHg       |                                                                   |                                                                   |                |
| Systolic                              | 135.3 (17.8)                                                      | 134.4(16.7)                                                       | 0.357          |
| Diastolic                             | 82.0 (9.7)                                                        | 81.8 (9.3)                                                        | 0.701          |
| Hs-CRP, median (IQR), mg/l            | 1.1 (0.6-2.2)                                                     | 1.1 (0.6-2.2)                                                     | 0.882          |
| Current smoking (%)                   | 54 (10.5)                                                         | 69 (10.1)                                                         | 0.860          |
| Hypertension (%)                      | 285 (55.5)                                                        | 340 (50.2)                                                        | 0.074          |
| Lipid-lowering medication (%)         | 24 (4.7)                                                          | 26 (3.8)                                                          | 0.480          |
| Education≤12 years (%)                | 203 (39.5)                                                        | 320 (47.3)                                                        | 0.007          |

**ESM Table 4** Multivariate analysis of the association between persistent *H. pylori* seropositivity and risk of developing diabetes (2007–2012)

| Variables                       | All Participants<br>( <i>n</i> =1191) |                | Participants without IFG<br>( <i>n</i> =1036) |                |
|---------------------------------|---------------------------------------|----------------|-----------------------------------------------|----------------|
|                                 | RR (95% CI)                           | <i>p</i> value | RR (95% CI)                                   | <i>p</i> value |
| <i>H. pylori</i> seropositivity | 0.61 (0.41, 0.93)                     | 0.020          | 0.50 (0.26, 0.99)                             | 0.048          |
| Age                             | 0.97 (0.94, 1.00)                     | 0.023          | 0.97 (0.92, 1.01)                             | 0.163          |
| Female                          | 1.11 (0.73, 1.69)                     | 0.621          | 0.97 (0.46, 2.05)                             | 0.940          |
| BMI                             | 1.03 (0.97, 1.09)                     | 0.337          | 0.99 (0.89, 1.11)                             | 0.903          |
| HDL-C                           | 0.63 (0.27, 1.48)                     | 0.288          | 0.77 (0.23, 2.52)                             | 0.662          |
| TG                              | 1.03 (0.67, 1.57)                     | 0.909          | 0.99 (0.49, 1.98)                             | 0.974          |
| Hs-CRP                          | 1.30 (0.82, 2.07)                     | 0.267          | 2.18 (1.08, 4.41)                             | 0.031          |
| SBP                             | 1.03 (0.98, 1.09)                     | 0.268          | 1.05 (0.95, 1.15)                             | 0.369          |
| FBG                             | 6.77 (4.57, 10.02)                    | <0.001         | 4.99 (1.81, 13.77)                            | 0.002          |
| Lipid-lowering medication       | 2.89 (1.32, 6.32)                     | 0.008          | 3.72 (1.29, 10.72)                            | 0.015          |
| Education > 12 years            | 0.94 (0.63, 1.40)                     | 0.772          | 0.89 (0.47, 1.69)                             | 0.728          |

**Adjusted variables:** age (continuous variable), female (male or female), body mass index (continuous variable), systolic blood pressure (per 5 mmHg, continuous variable), high-density lipoprotein cholesterol (continuous variable), triacylglycerol (<1.7 or ≥1.7 mmol/l), fasting blood glucose (continuous variable), lipid-lowering therapy (no or yes), high-sensitivity C-reactive protein (<3 or ≥3 mg/l) and education levels (≤12 or >12 years)

**ESM Table 5** Competing Risk Analysis for the participants lost and died (2002-2012)

| Variables                       | Model 1 <sup>a</sup> |                | Model 2 <sup>b</sup> |                |
|---------------------------------|----------------------|----------------|----------------------|----------------|
|                                 | RR (95% CI)          | <i>p</i> value | RR (95% CI)          | <i>p</i> value |
| <i>H. pylori</i> seropositivity | 0.81 (0.66, 1.01)    | 0.061          | 0.87 (0.75, 1.00)    | 0.053          |
| Age                             | 0.98 (0.96, 1.00)    | 0.022          | 1.01 (1.00, 1.02)    | 0.146          |
| Female                          | 1.07 (0.84, 1.36)    | 0.576          | 0.82 (0.70, 0.97)    | 0.024          |
| BMI                             | 1.07 (1.03, 1.10)    | <0.001         | 1.03 (1.00, 1.05)    | 0.030          |
| HDL-C                           | 0.61 (0.38, 0.97)    | 0.036          | 0.72 (0.53, 0.97)    | 0.033          |
| TG                              | 1.19 (0.93, 1.52)    | 0.166          | 1.14 (0.97, 1.34)    | 0.115          |
| Hs-CRP                          | 1.43 (1.11, 1.84)    | 0.005          | 1.34 (1.13, 1.59)    | 0.001          |
| SBP (5 mmHg)                    | 1.03 (1.00, 1.06)    | 0.099          | 1.02 (1.00, 1.04)    | 0.133          |
| FBG                             | 3.45 (2.96, 4.01)    | <0.001         | 1.90 (1.70, 2.12)    | <0.001         |
| Lipid-lowering medication       | 1.74 (1.27, 2.39)    | 0.001          | 1.13 (0.89, 1.44)    | 0.313          |
| Education > 12 years            | 1.26 (0.98, 1.61)    | 0.075          | 0.91 (0.77, 1.07)    | 0.259          |

<sup>a</sup> Assuming that all of these participants died or lost in follow-up did not develop diabetes between 2002 and 2012 (Total number of diabetes: 259)

<sup>b</sup> Assuming that all of these participants died or lost in follow-up developed diabetes between 2002 and 2012 (Total number of diabetes: 523)

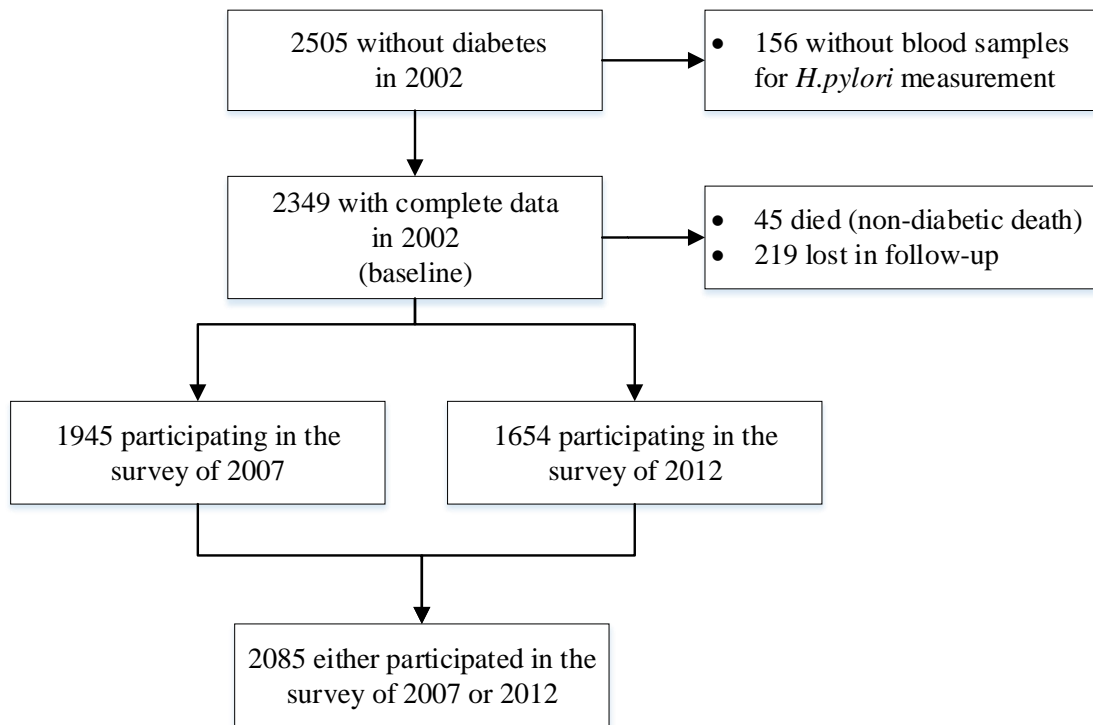

**ESM Fig. 1(a) Study population**

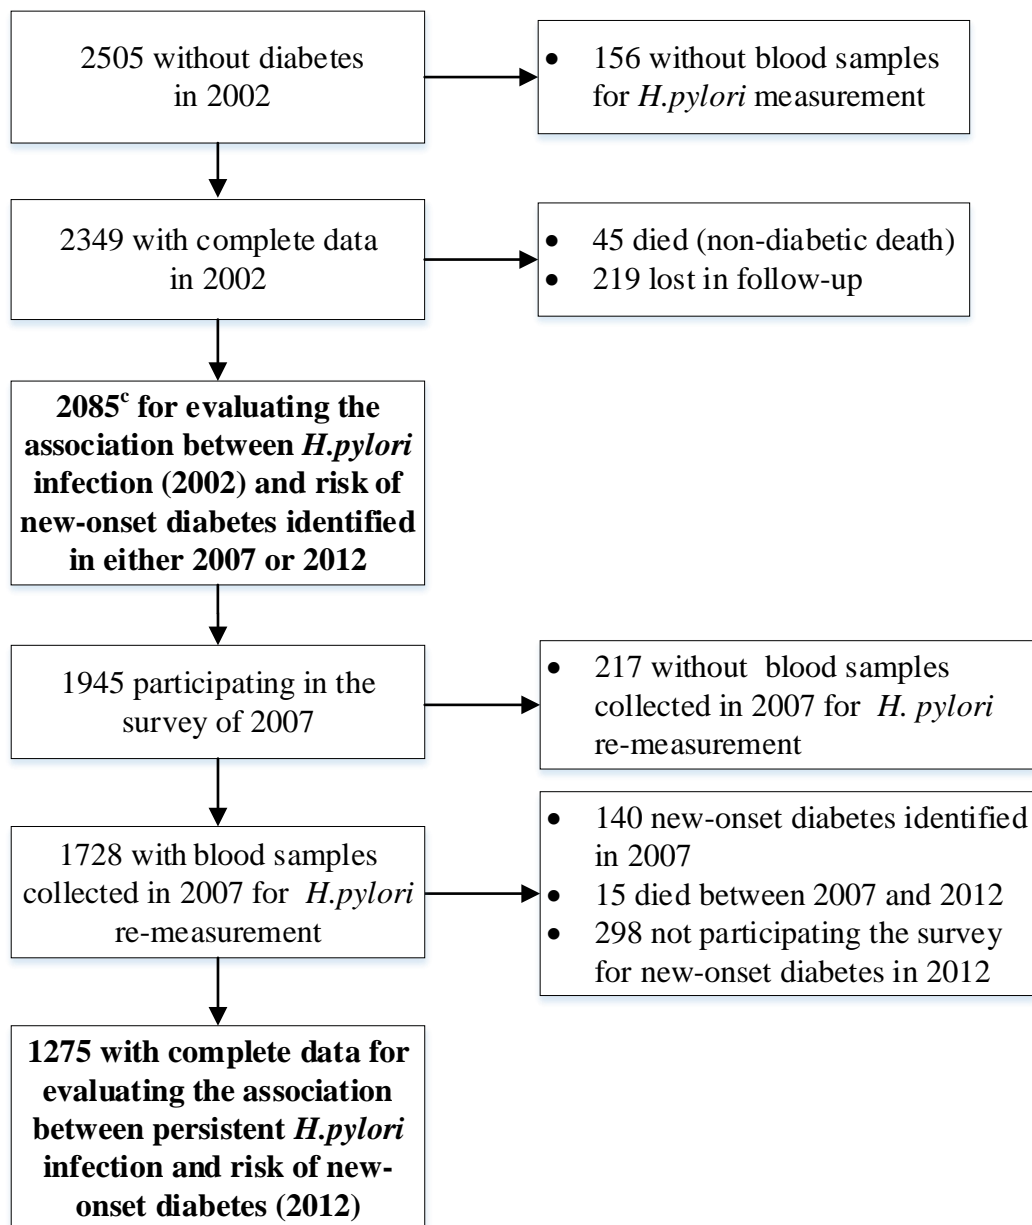

ESM Fig. 1(b) Study population

<sup>c</sup> One of the participants had no diabetes at baseline (2002) and did not participate in the survey of 2007, but died of diabetes in 2008. As she had complete information at baseline and had outcome, we also included her in this study.



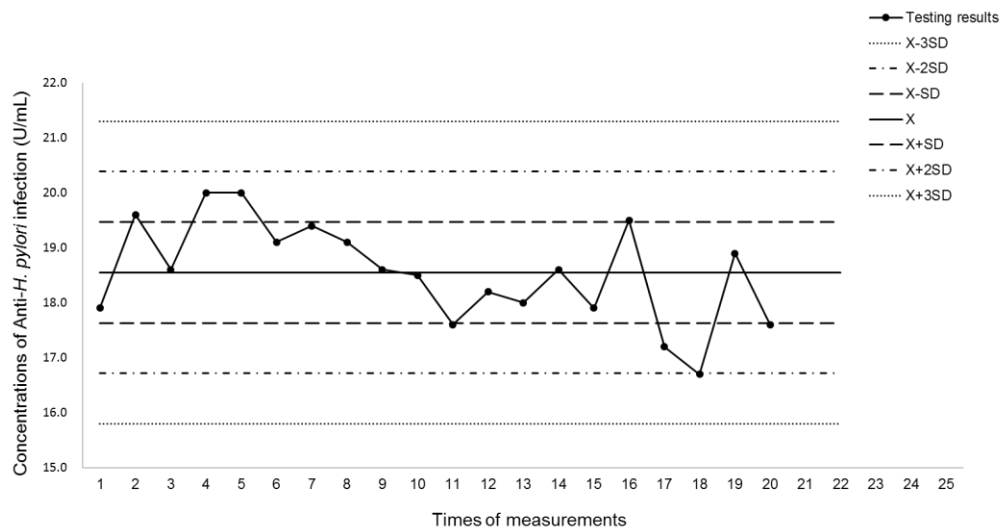

**ESM Fig. 2 (a) Pre-study validation of the *H. pylori* antibodies measurement with known high-concentrations of *H. pylori* antibodies samples.**

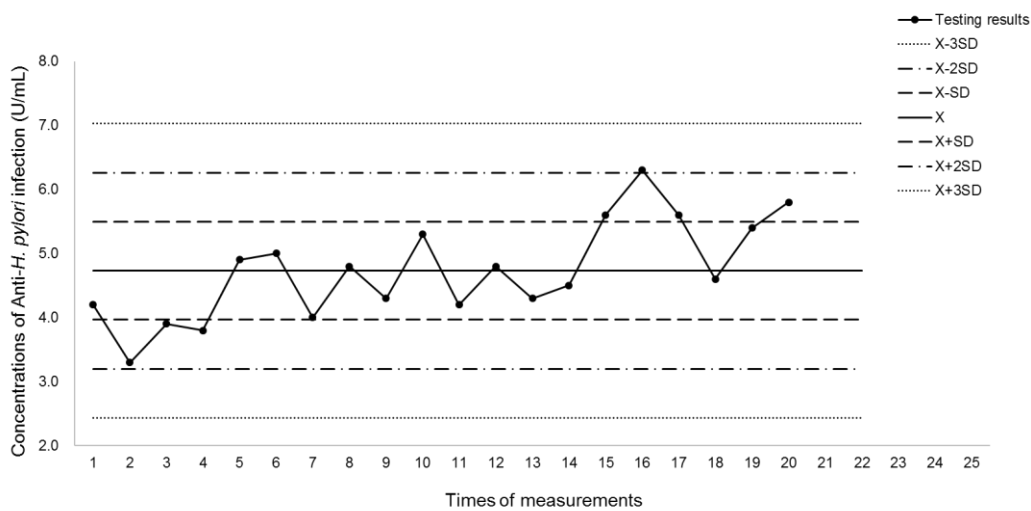

**ESM Fig. 2 (b) Pre-study validation of the *H. pylori* antibodies measurement with known low-concentrations of *H. pylori* antibodies samples.**
